# Supplementary material for: Thiolated γ-polyglutamic acid as a bioadhesive hydrogel-forming material: evaluation of gelation, bioadhesive properties and sustained release of KGF in the repair of injured corneas
Source: Royal Society of Chemistry journal article supplement (doi:10.1039/c9bm00341j), 2019-01-01
Supplement: c9bm00341j1.pdf [file c9bm00341j1.pdf]

### Supporting information

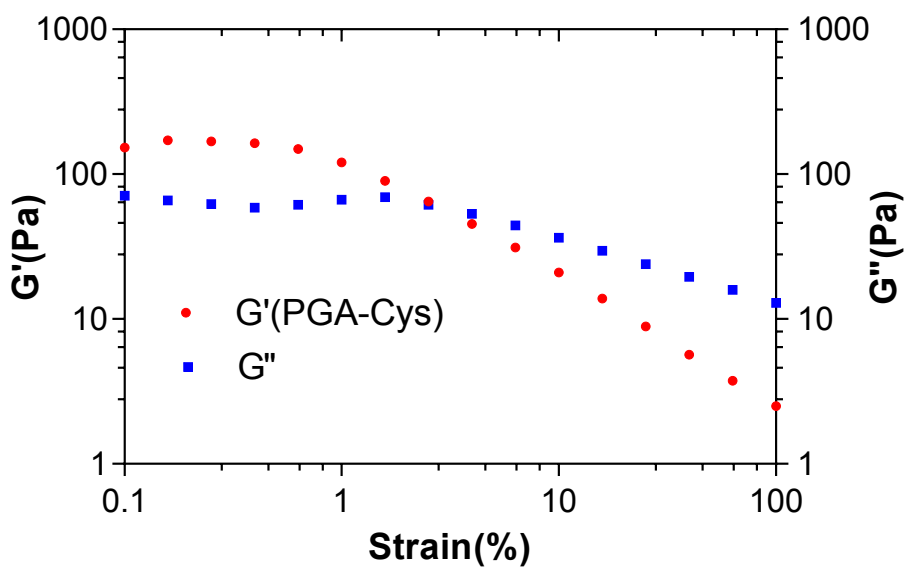

FigS1 Oscillatory strain sweeps of PGA-Cys-1.5 hydrogel at concentration of 4%

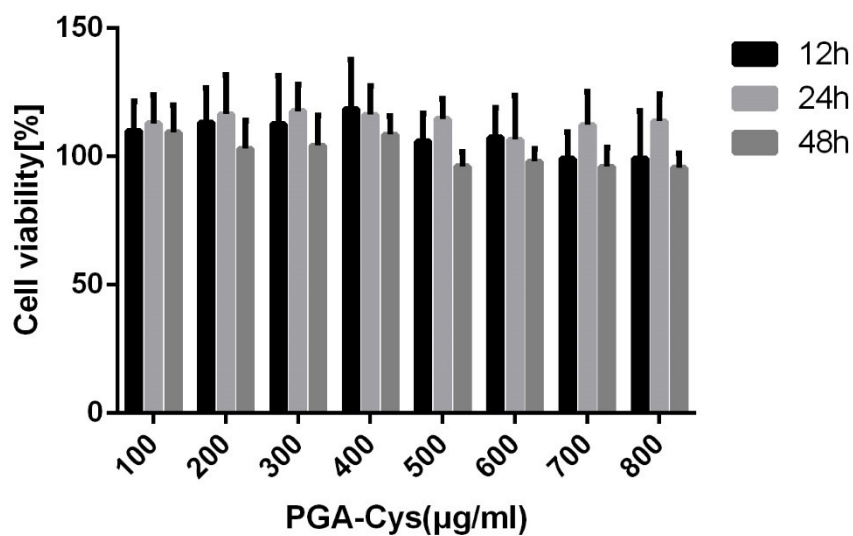

Fig S2 Toxicity of PGA-Cys hydrogel on NIH3T3 cells

Table S1 The thiol group contents of PGA -Cys at different feed ratios determined by <sup>1</sup>H-NMR and Ellman's assay

| The theoretical feeding ratio of PGA/Cys | The actual content of thiols |                         |
|------------------------------------------|------------------------------|-------------------------|
|                                          | Ellman's assay (%)           | <sup>1</sup> H- NMR (%) |
| 1:1                                      | 6.7±2.1                      | 7.2±4.0                 |
| 1:2                                      | 11.7±2.5                     | 13.1±1.8                |
| 1:3                                      | 18.3±3.7                     | 20.2±5.1                |
| 1:4                                      | 25.1±1.4                     | 27.5±1.3                |
| 1:5                                      | 31.3±4.6                     | 35.7±3.7                |
